# Supplementary material for: Possible formation of H2 hydrates in different nanotubes and surfaces using molecular dynamics simulation
Source: Royal Society of Chemistry journal article supplement (doi:10.1039/d4ra00064a), 2024-01-01
Supplement: d4ra00064a1.pdf [file d4ra00064a1.pdf]

## Supporting Information

### **Possible formation of H<sub>2</sub>-hydrate in different nanotubes and surfaces using molecular dynamic simulation**

Mohsen Abbaspour<sup>\*1</sup>, Hamed Akbarzadeh,<sup>2</sup> Sirous Salemi<sup>1</sup>, Somayeh Mazloomi-Moghadam<sup>1</sup>,  
and Parnian Yousefi<sup>3</sup>

<sup>1</sup>*Dep. of Chemistry, Hakim Sabzevari University, Sabzevar, Iran*

<sup>2</sup>*Dep. of Physical Chemistry, Faculty of Chemistry, Kharazmi University, Tehran, Iran*

<sup>3</sup>*Dep. of Chemistry, Ferdowsi University of Mashhad, Mashhad, Iran*

---

\* Corresponding authors' emails: [m.abbaspour@hsu.ac.ir](mailto:m.abbaspour@hsu.ac.ir)

**Table S1.** The lateral and perpendicular components of the pressures tensor of the confined water molecules in the different systems. The x-direction is parallel to the nanotubes and surfaces. The z-direction is perpendicular to the nanotube and surfaces.

| System                                                            |        | $P_{\parallel} : (P_{xx} + P_{yy})/2$<br>(katm) | $P_{\perp} : P_{zz}$<br>(katm) |
|-------------------------------------------------------------------|--------|-------------------------------------------------|--------------------------------|
| 126 H <sub>2</sub> O and 18 H <sub>2</sub> in<br>Nanotubes        | Carbon | 0.1967                                          | 0.3149                         |
|                                                                   | BN     | -0.1845                                         | -0.1052                        |
|                                                                   | SiC    | 0.7565                                          | 0.8209                         |
| 210 H <sub>2</sub> O and 38 H <sub>2</sub><br>between<br>Surfaces | Carbon | 0.9024                                          | 3.3812                         |
|                                                                   | BN     | 8.2469                                          | 21.800                         |
|                                                                   | SiC    | 9.8643                                          | 25.462                         |

**Table S2.** The lateral and perpendicular components of the pressures tensor of the confined water molecules in the different systems

| System                                                            |         | $P_{\parallel} : (P_{xx} + P_{yy})/2$<br>(katm) | $P_{\perp} : P_{zz}$<br>(katm) |
|-------------------------------------------------------------------|---------|-------------------------------------------------|--------------------------------|
| 210 H <sub>2</sub> O and 38 H <sub>2</sub><br>between<br>Surfaces | Carbon  | 0.9024                                          | 3.3812                         |
|                                                                   | new BN  | 1.4189                                          | 5.6005                         |
|                                                                   | new SiC | 1.2073                                          | 5.0366                         |

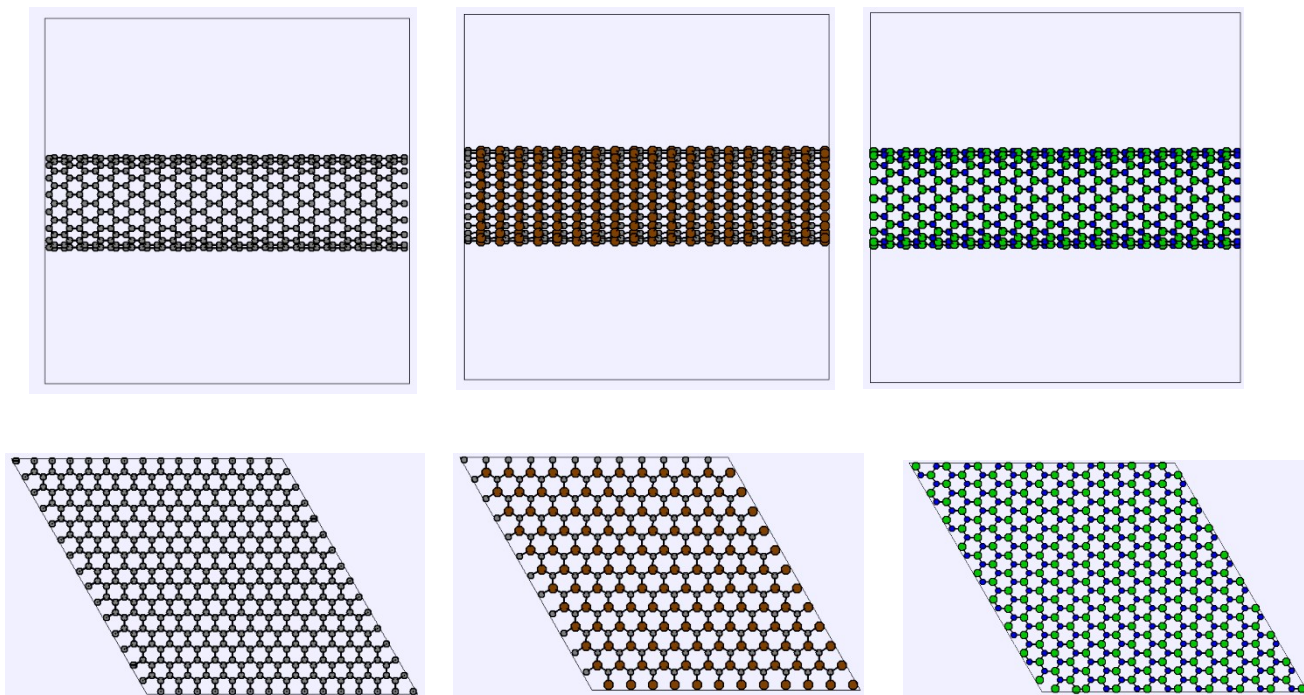

**Fig. S1.** The snapshots of all nanotubes and surfaces used in this work.

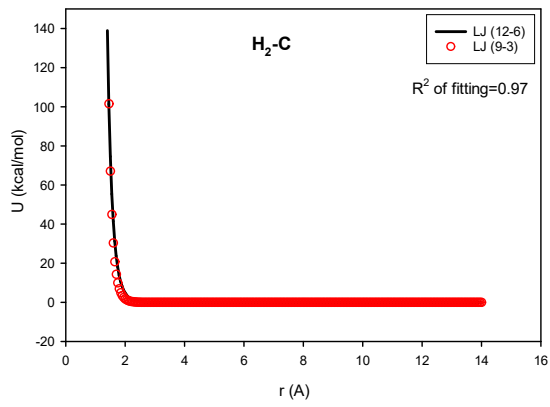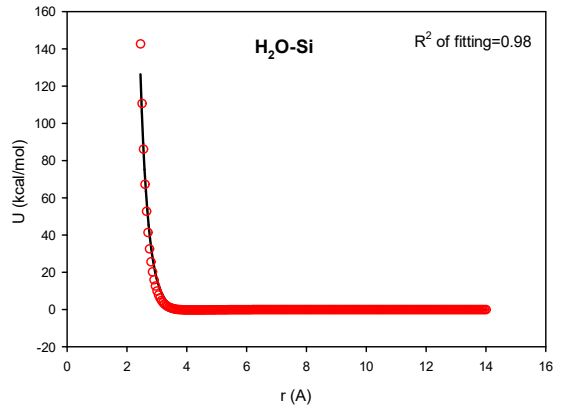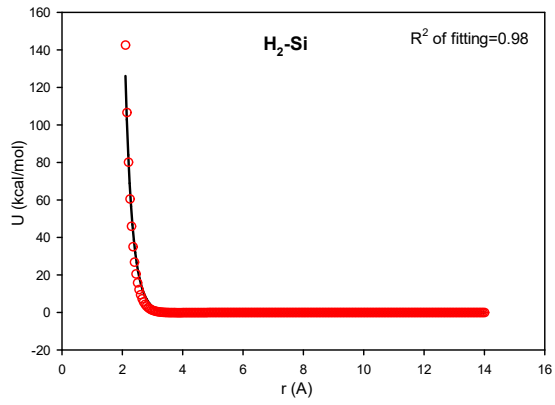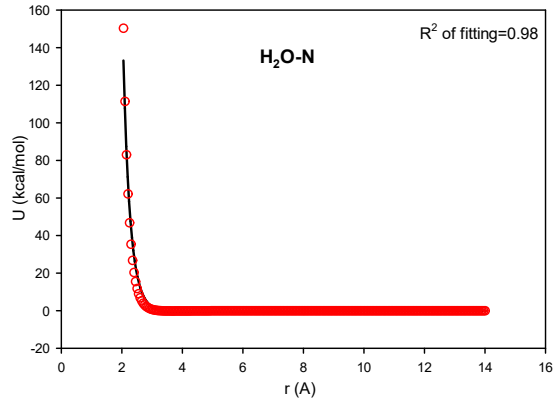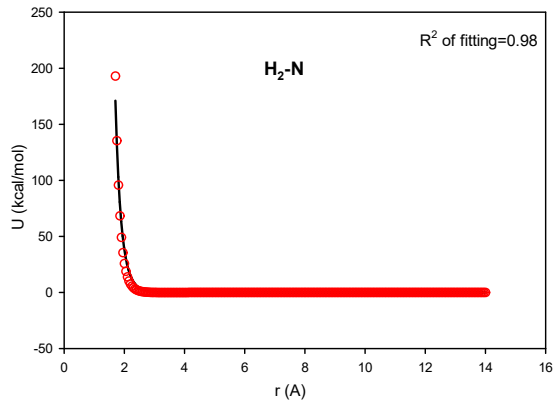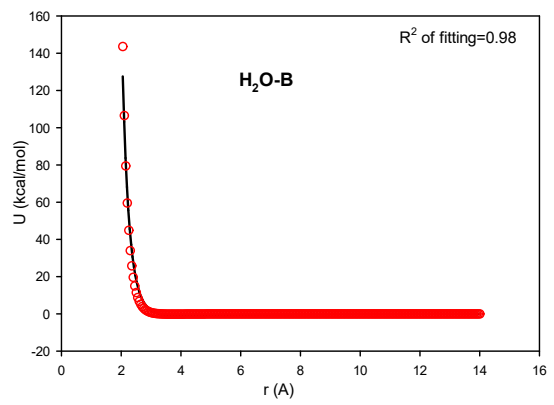

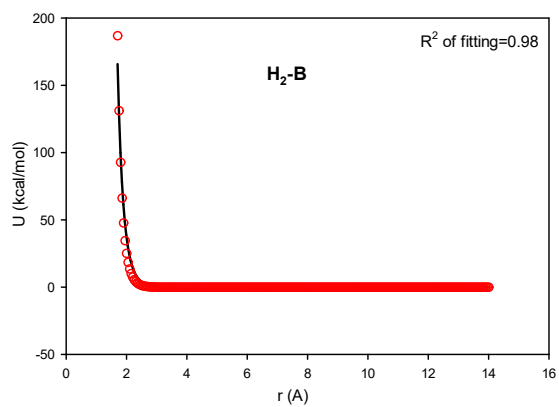

**Fig. S2.** The fitted (9-3) LJ potential to the (12-6) potential for different interactions.

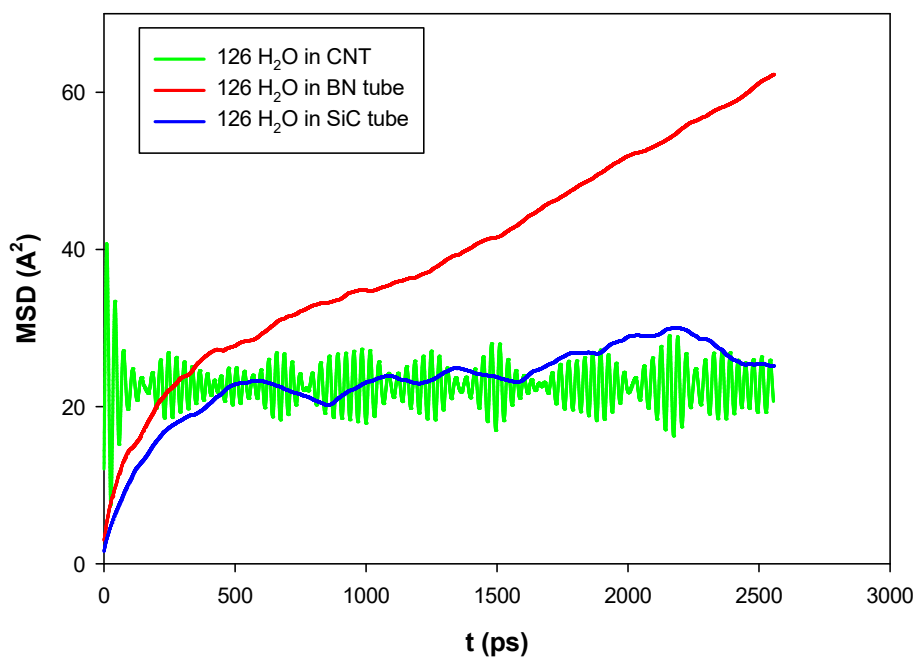

**Fig. S3.** The MSD curves of the confined  $H_2$  molecules in the different nanotubes.

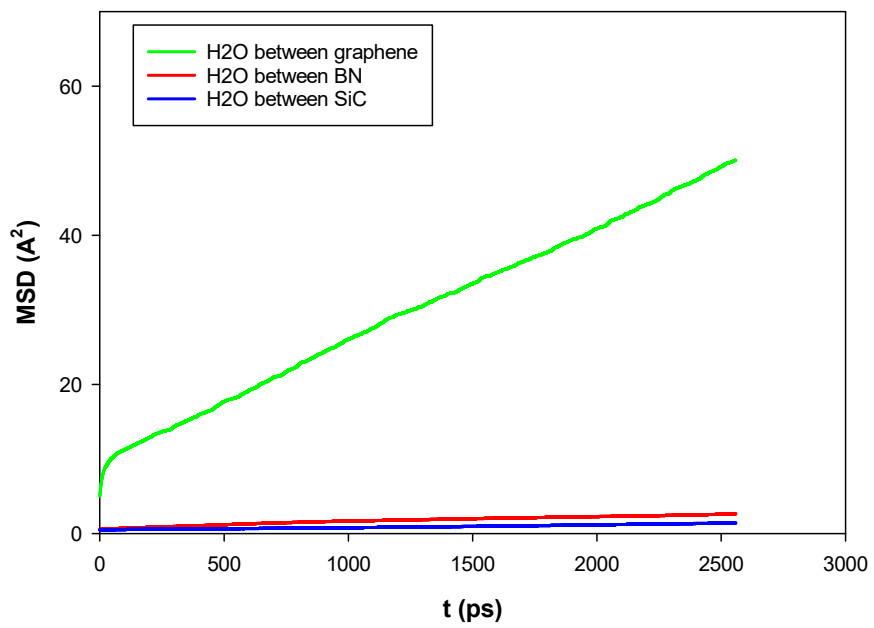

**Fig. S4.** The MSD curves of the confined H<sub>2</sub> molecules between the different surfaces.

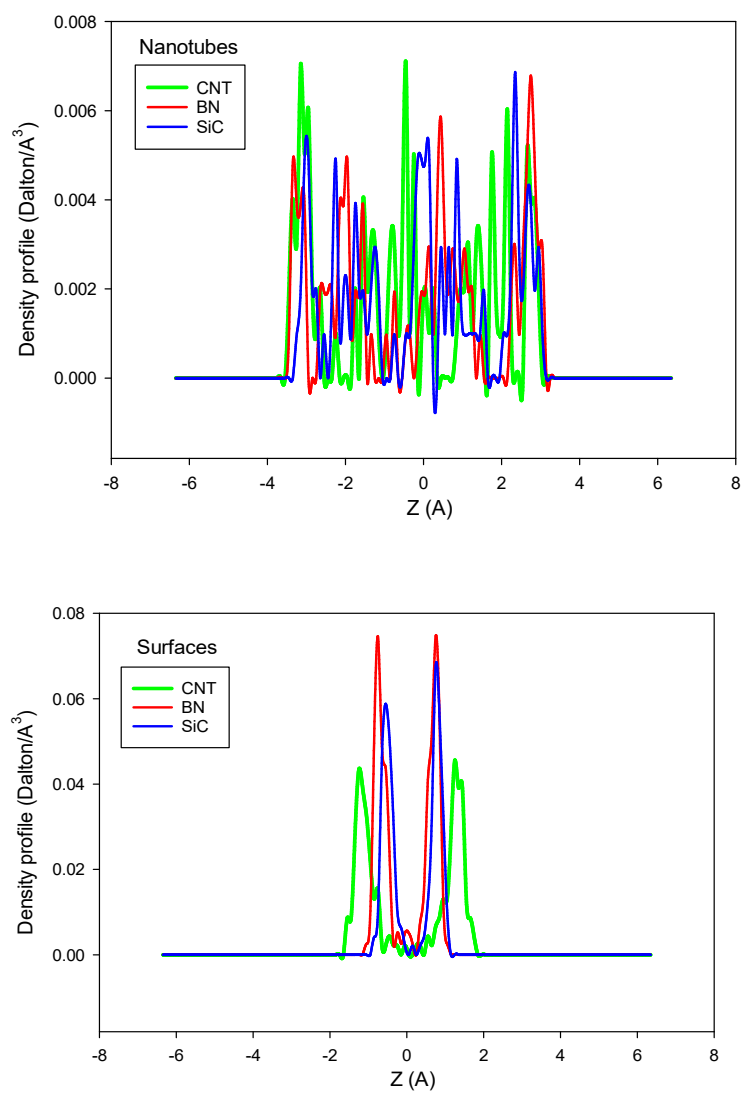

**Fig. S5.** The density profiles of the confined water molecules in the different nanotubes and surface.



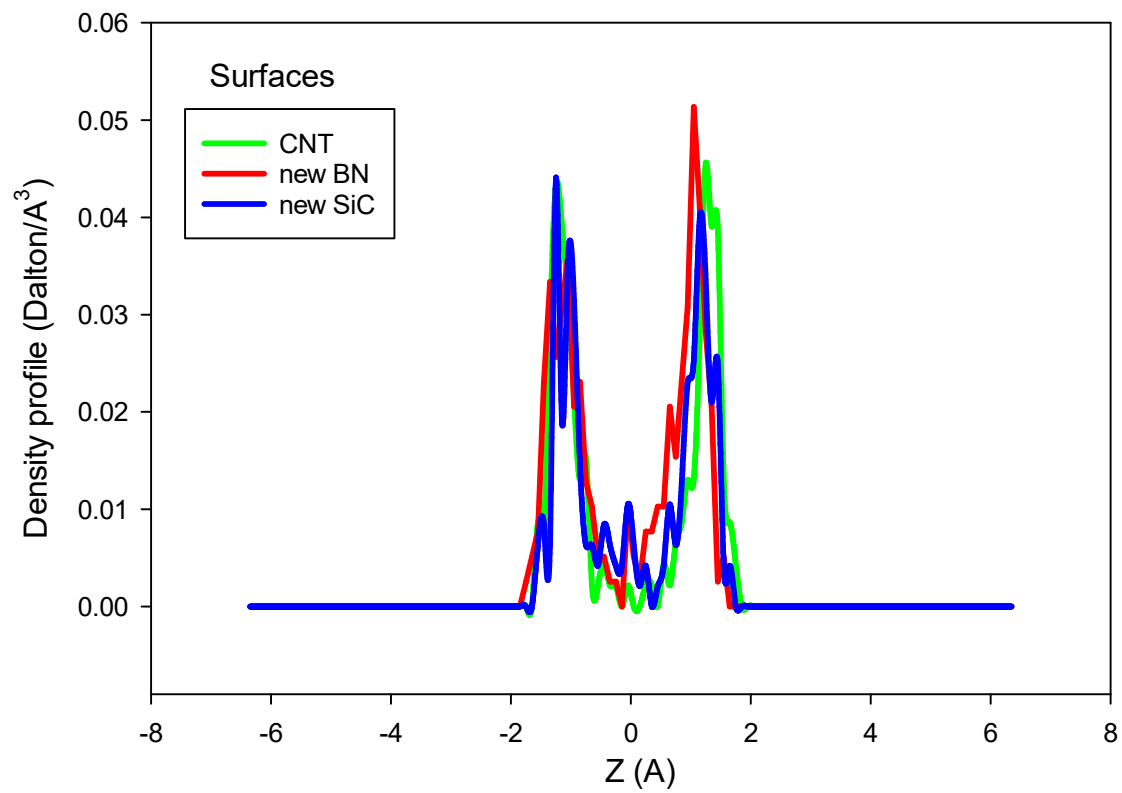

**Fig. S6.** The density profiles of the confined water molecules in the different surfaces.
